# Supplementary material
Source: publisher site journal article supplement (https://www.dovepress.com/article/466363)
Supplement: Supplementary file 1 [file get_supplementary_file.php]

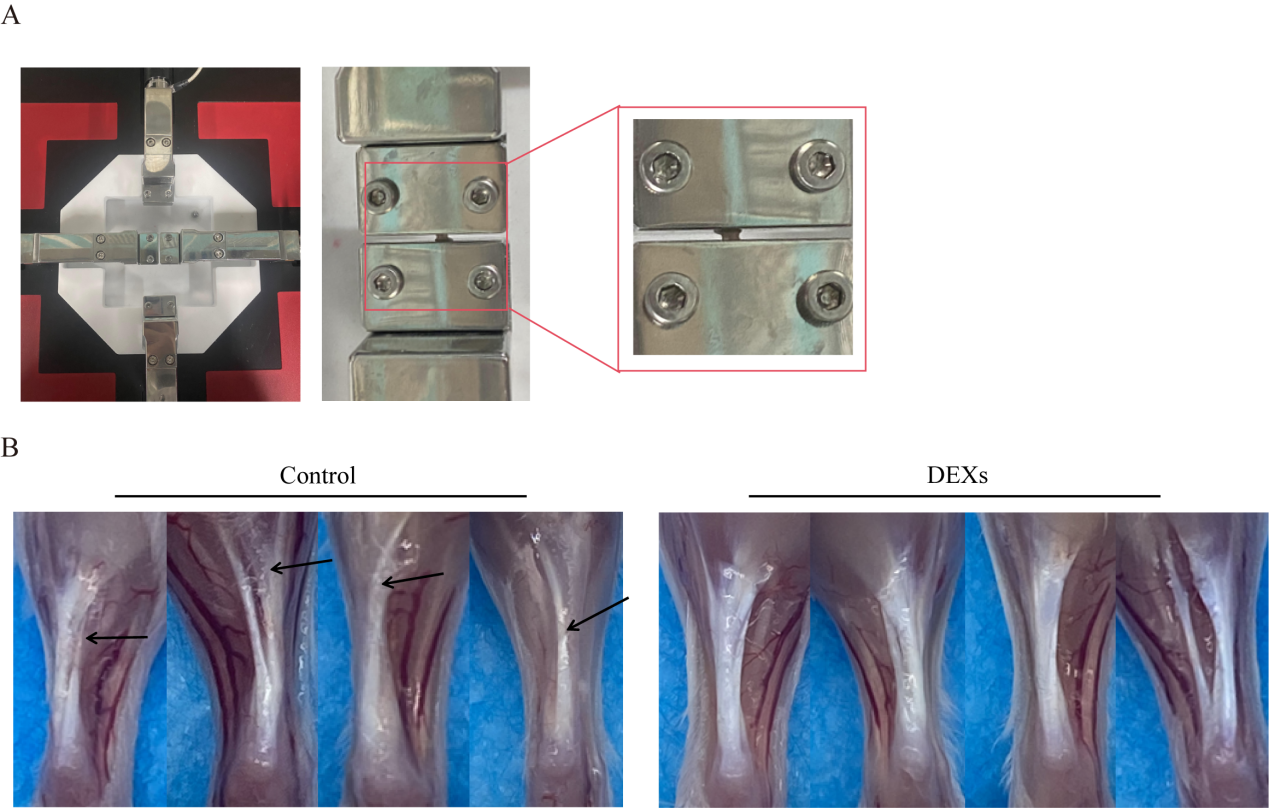


**Figure S1** DEXs promote tendon healing. (**A**) The apparatus used to perform the tendon tensile tests, including the metal sensor, specimens, and mechanical testing clamp. (**B**) Images of Achilles tendon. The black arrows in the control group marked the sites of tendon rupture.
